1                                   **Title:** Relatively Shorter Muscle Lengths Increase  
2                                   the Metabolic Rate of Cyclic Force Production

3  
4                                   **Authors:** Owen N. Beck,<sup>1,2\*</sup> Jordyn N. Schroeder,<sup>1</sup> Lindsey H. Trejo,<sup>1,3</sup>  
5                                   Jason R. Franz,<sup>4</sup> & Gregory S. Sawicki<sup>1,2,3,4</sup>

6  
7                                   <sup>1</sup>George W. Woodruff School of Mechanical Engineering, <sup>2</sup>School of Biological Sciences,  
8                                   <sup>3</sup>Parker H. Petit Institute for Bioengineering and Biosciences,  
9                                   Georgia Institute of Technology, Atlanta, GA, USA  
10                                   <sup>4</sup>Joint Department of Biomedical Engineering, University of North Carolina at Chapel Hill and  
11                                   North Carolina State University, Chapel Hill, NC, USA

12  
13                                   **\*Corresponding Author**  
14                                   Name: Owen N. Beck  
15                                   Address: Georgia Institute of Technology  
16                                   School of Mechanical Engineering  
17                                   455 Callaway Manufacturing Research Center Building  
18                                   813 Ferst Dr NW  
19                                   Atlanta, GA 30332  
20                                   E-mail: [obeck3@gatech.edu](mailto:obeck3@gatech.edu)

21 **Abstract**

22 During animal locomotion, force-producing leg muscles are almost exclusively responsible for  
23 the whole-body's metabolic energy expenditure. Animals can change the length of these leg  
24 muscles by altering body posture (*e.g.*, joint angles), kinetics (*e.g.*, body weight), or the structural  
25 properties of their biological tissues (*e.g.*, tendon stiffness). Currently, it is uncertain whether  
26 relative muscle fascicle operating length has a measurable effect on the metabolic energy  
27 expenditure of cyclic locomotion-like contractions. To address this uncertainty, we measured the  
28 metabolic energy expenditure of human participants as they cyclically produce two distinct ankle  
29 moments at three separate ankle angles (90°, 105°, 120°) on a fixed-position dynamometer  
30 exclusively using their soleus. Overall, increasing participant ankle angle from 90° to 120° (more  
31 plantar flexion) reduced minimum soleus fascicle length by 17% (both moment levels,  $p < 0.001$ )  
32 and increased metabolic energy expenditure by an average of 208% (both  $p < 0.001$ ). Across both  
33 moment levels, the increased metabolic energy expenditure was not driven by greater fascicle  
34 positive mechanical work (higher moment level,  $p = 0.591$ ), fascicle force rate (both  $p \geq 0.235$ ), or  
35 active muscle volume (both  $p \geq 0.122$ ); but it was correlated with average relative soleus fascicle  
36 length ( $r = -0.179$ ,  $p = 0.002$ ) and activation ( $r = 0.51$ ,  $p < 0.001$ ). Therefore, the metabolic energy  
37 expended during locomotion can likely be reduced by lengthening active muscles that operate on  
38 the ascending-limb of their force-length relationship.

39 **Key Words:** Energetic, Economy, Efficiency, Dynamometer, Soleus

## 40 **Introduction**

41 Leg muscles govern walking and running performance. During the stance phase of walking and  
42 running, leg extensor muscles produce force in part to support and accelerate the body into the  
43 subsequent step. Concurrently, these force-producing leg muscles are almost exclusively  
44 responsible for the whole-body's metabolic energy expenditure (Poole *et al.*, 1992; Griffin *et al.*,  
45 2003; Marsh & Ellerby, 2006). Further, reducing an animal's metabolic energy expenditure to  
46 perform a locomotor task increases how far they can travel at a given speed (Beck *et al.*, 2018)  
47 and how fast they can cover a fixed distance (Hoogkamer *et al.*, 2016). Thus, reducing the  
48 metabolic energy expenditure of an animal's leg muscles while they continue fulfilling the  
49 physical requirements to sustain locomotion should improve locomotor performance.

50

51 Simply increasing the operating length of leg extensor muscles may decrease whole-body  
52 metabolic energy expenditure and improve locomotor performance. After all, the leg extensor  
53 muscles of many walking and running animals operate at shorter lengths than optimal (on the  
54 ascending limb of the force-length relationship) during ground contact (Roberts *et al.*, 1997;  
55 Biewener & Corning, 2001; Burkholder & Lieber, 2001; Daley & Biewener, 2003; Rubenson *et*  
56 *al.*, 2012; Bohm *et al.*, 2019). This is notable because muscles utilize more adenosine  
57 triphosphate (ATP) per unit of force production when they are maximally activated at shorter  
58 lengths than optimal (less economical force production) (Fig. 1) (Elzinga *et al.*, 1984;  
59 Stephenson *et al.*, 1989; Kentish & Stienen, 1994; Hilber *et al.*, 2001). Numerically, Hilber and  
60 colleagues (Hilber *et al.*, 2001) reported that compared to maximally producing force at an  
61 optimal length, sarcomere force production is 127% and 177% less economical at 0.8 and 0.6 of  
62 its optimal length, respectively. To envision the implications of these values during locomotion,

63 the largest human ankle extensor muscle (soleus) is reported to produce force at 0.65 to 0.99 of  
64 its maximal voluntary contraction's optimal length during the ground contact of walking and  
65 running (Rubenson *et al.*, 2012). These *in vivo* muscle lengths (*i.e.*, 0.65 to 0.99) may be  
66 overestimated due an inverse relationship between muscle activation and optimal fascicle length  
67 (Holt & Azizi, 2014; Hessel *et al.*, 2020). Furthermore, at shorter muscle lengths than optimal,  
68 active force production is reduced per unit of activation (Hill, 1953; Gordon *et al.*, 1966). Hence,  
69 for muscles to keep producing the force required to sustain locomotion, operating at shorter  
70 lengths than optimal requires the body to activate more muscle fibers and/or increase rate coding,  
71 both of which increase metabolic energy expenditure (Christie *et al.*, 2016; Beck *et al.*, 2019).  
72 Altogether, increasing the length of active leg muscles that operate at shorter lengths than  
73 optimal during stance likely decreases whole-body metabolic energy expenditure during  
74 locomotion.

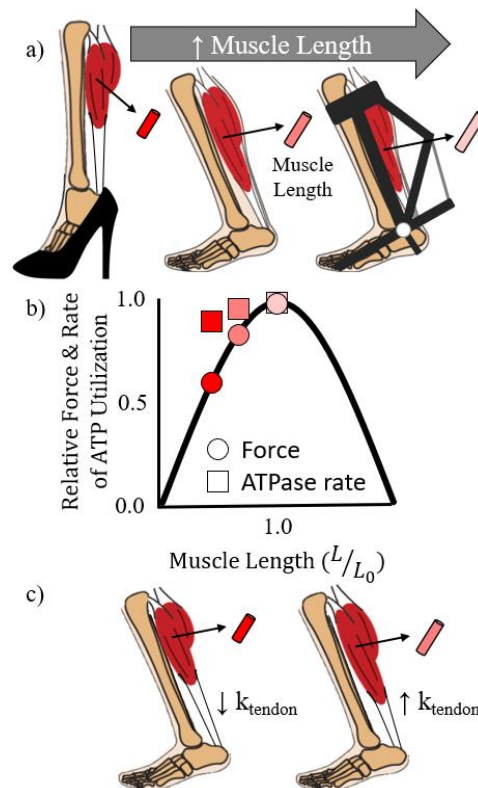

75

76 **Figure 1.** Illustrations of triceps surae fascicle lengths during the mid-stance of walking a) in  
77 high-heeled shoes (Csapo *et al.*, 2010; Cronin *et al.*, 2012), barefoot, with an ankle exoskeleton  
78 (Nuckols *et al.*, 2020), as well as c) barefoot with a more compliant and stiffer Achilles tendon  
79 ( $k_{\text{tendon}}$ ). b) Conceptual graph showing isometric muscle fascicle force production and adenosine  
80 triphosphate (ATP) utilization relative to optimal muscle operating length ( $L_0$ ) (Hilber *et al.*,  
81 2001).

82

83 Despite the aforementioned rationale, muscle operating lengths are not often considered to have  
84 a *measurable* effect on whole-body metabolic energy expenditure during locomotion (Taylor,  
85 1994; Minetti & Alexander, 1997; Pontzer, 2016; Kipp *et al.*, 2018; van der Zee & Kuo, 2020).  
86 This omission may be because the metabolic influence of producing force at different muscle  
87 lengths is typically studied during isometric contractions (Elzinga *et al.*, 1984; Stephenson *et al.*,  
88 1989; Kentish & Stienen, 1994; Hilber *et al.*, 2001), rather than during cyclic length changing  
89 contractions that better mimic locomotion muscle mechanics. Another reason is that it is difficult  
90 to separate the metabolic effect of muscle operating lengths from other biomechanical  
91 parameters during locomotor-like contractions. For instance, when force-producing muscles  
92 shorten they perform mechanical work, and the further that a force-producing muscle shortens  
93 the more metabolic energy it expends (Fenn, 1924; Ortega *et al.*, 2015). Scientists commonly  
94 attribute this increased metabolic energy expenditure to greater muscle mechanical work (Fenn,  
95 1924; Ortega *et al.*, 2015) rather than the muscle producing force at less economical lengths.  
96 While it is nearly impossible to experimentally disentangle the metabolic effect of muscle  
97 operating lengths from other metabolically-relevant biomechanical parameters during  
98 locomotion, such as force and work, a controlled experiment that emulates aspects of locomotion  
99 may be capable of accomplishing the task.

100

101 To help link walking and running biomechanics to metabolic energy expenditure, our goal was to  
102 determine the metabolic influence of cyclically producing force at different muscle fascicle  
103 lengths. To accomplish this goal, we quantified the fascicle mechanics and metabolic energy  
104 expenditure of human soleus muscles as they cyclically produced force at different relative  
105 lengths. Based on the notion that producing a given force at relatively shorter fascicle lengths  
106 increases metabolic energy expenditure (Elzinga *et al.*, 1984; Stephenson *et al.*, 1989; Kentish &  
107 Stienen, 1994; Hilber *et al.*, 2001; Beck *et al.*, 2019), we hypothesized that cyclically producing  
108 the same average force at relatively shorter fascicle lengths would increase metabolic energy  
109 expenditure.

110

## 111 **Methods**

112 *Participants.* Nine volunteers completed the protocol (average  $\pm$  SD; age:  $26.3 \pm 2.6$  years;  
113 standing height:  $1.77 \pm 0.07$  m; mass:  $74.9 \pm 11.4$  kg; resting metabolic power  $87 \pm 12$  W;  
114 Achilles tendon moment arm during barefoot standing:  $4.9 \pm 0.4$  cm; resting soleus fascicle  
115 length:  $4.1 \pm 0.6$  cm; estimated maximum soleus fascicle shortening velocity:  $182 \pm 25$  mm/s  
116 (Bohm *et al.*, 2019)). Prior to the study, each participant gave informed written consent in  
117 accordance with the Georgia Institute of Technology Central Institutional Review Board.

118

119 *Protocol.* Participants arrived to the laboratory in the morning following an overnight fast. Upon  
120 arrival, participants laid supine on a dynamometer with custom attachments that supported their  
121 legs in the testing position: right knee and ankle supported at  $50^\circ$  and  $90^\circ$ , respectively (Fig. 2).  
122  $90^\circ$  indicates perpendicular segments and more acute angles indicates joint (dorsi)flexion. In this

123 position, participants rested for 10 minutes while breathing into a mouth piece that channeled  
124 expired air to a metabolic cart (TrueOne 2400, ParvoMedic, Sandy, UT, USA). Next, we shaved  
125 participant leg hair and used electrode preparation gel to lightly abrade the skin superficial to  
126 their right soleus, lateral gastrocnemius, and tibialis anterior (NuPrep, Weaver and Co., Aurora,  
127 CO). Subsequently, we placed a bipolar surface electrode over the skin superficial to each  
128 respective muscle belly and in the same orientation as the muscle fascicles (Delsys Inc., Natick,  
129 MA). We secured a linear-array B-mode ultrasound probe to the skin superficial of each  
130 participant's right medial soleus (Teleded, Vilnius, Lithuania). We placed reflective markers on  
131 the dynamometer at its axis of rotation, 10 cm above the axis of rotation, as well as on the  
132 participant's skin/clothes superficial to their right leg's medial knee-joint center, medial  
133 malleolus, and first metatarsal head (Fig. 2).

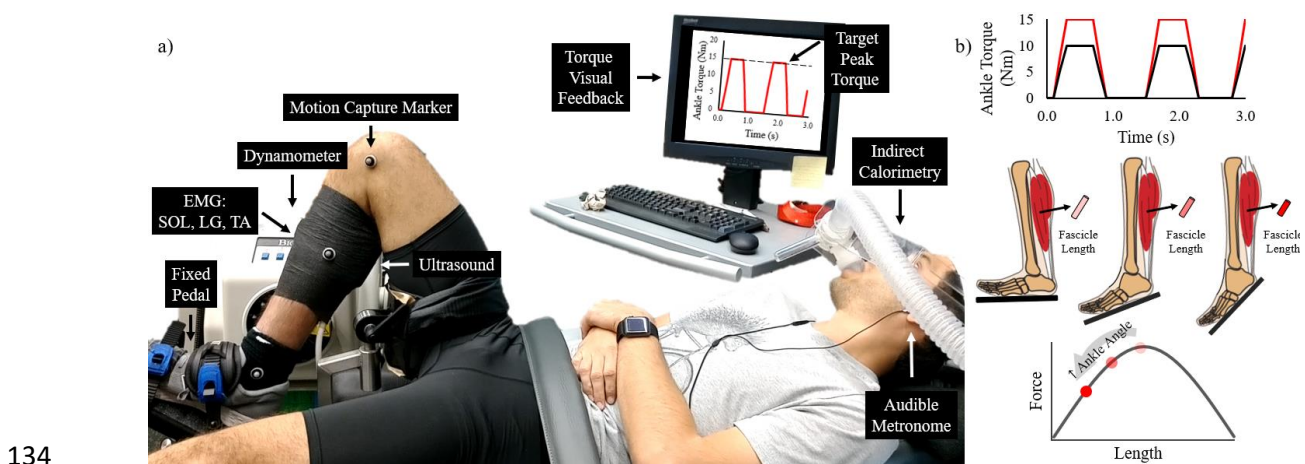

135 **Figure 2.** a) Experimental setup of a participant cyclically generating soleus muscle force to  
136 produce a plantar flexor moment that exerts an external torque on a fixed dynamometer pedal  
137 following the cues of an audible metronome and visual feedback. EMG, electromyography;  
138 SOL, soleus; LG, lateral gastrocnemius; TA, tibialis anterior. b) Illustrations of the two target  
139 torque levels (peak torque: 10 Nm and 15 Nm), three ankle angles (90°, 105°, and 120°) with the  
140 corresponding hypothetical minimum soleus fascicle operating lengths and their respective  
141 location on a muscle force-length relationship.

142

143 Next, participants performed four maximum voluntary contractions (MVCs) with their ankle  
144 joint center in-line with the dynamometer's axis of rotation (Biodex Medical Systems Inc.,  
145 USA): three plantar flexion MVCs and one dorsiflexion MVC. In a random order, participants  
146 conducted plantar flexor MVCs with their right knee at  $\sim 70^\circ$ ,  $60^\circ$  and  $50^\circ$  and their ankle at  $90^\circ$   
147 (Rubenson *et al.*, 2012). Because MVC ankle moment did not increase with more extended knee  
148 angles, we deemed the contribution of the bi-articular gastrocnemius on ankle moment to be  
149 negligible (Rubenson *et al.*, 2012). Next, participants performed a dorsiflexion MVC with their  
150 right knee at  $50^\circ$  and ankle at  $90^\circ$  to maximally activate their tibialis anterior. At least two  
151 minutes of rest preceded each MVC to mitigate fatigue (Kawakami *et al.*, 2000).

152

153 Participants then performed six, five-minute trials with their knee at  $50^\circ$  separated by at least five  
154 minutes of rest. These trials consisted of each participant repeatedly producing plantar flexor  
155 moments on a fixed-position dynamometer foot-pedal at the downbeat of an audible metronome  
156 and then relaxing at the subsequent upbeat (metronome played at 1.5 Hz; Fig. 2). To guide ankle  
157 plantar flexor moments throughout each trial, participants watched a computer screen that  
158 displayed the trial's target maximum dynamometer torque and the recorded dynamometer torque  
159 profile over the previous 5-10 s. Participants performed trials at each of the two dynamometer  
160 torque levels (10 Nm and 15 Nm) at the following ankle angles:  $90^\circ$ ,  $105^\circ$ , and  $120^\circ$ . We  
161 randomized the trial order and collected rates of oxygen uptake and carbon dioxide production,  
162 dynamometer torque data (100 Hz), motion capture data (200 Hz) (Vicon Motion Systems, UK),  
163 soleus fascicle length and orientation (100 Hz), as well as the surface electromyography of the  
164 soleus, tibialis anterior, and lateral gastrocnemius (1000 Hz) (Fig. 2).

165



166 *Soleus fascicle mechanics.* To determine soleus fascicle kinematics, we recorded B-mode  
167 ultrasound images containing the posterior-medial soleus. We recorded soleus fascicle images  
168 during 20 seconds in the last two minutes of the metabolic trials. Within these 20 s, we post-  
169 processed soleus fascicle lengths and pennation angles throughout six consecutive moment  
170 generation cycles using a semi-automated tracking software (Farris & Lichtwark, 2016). For  
171 semi-automated images that did not accurately track the respective soleus fascicle's position, we  
172 manually redefined the desired fascicle. We filtered soleus fascicle angle and length using a  
173 fourth-order low-pass Butterworth filter (6 Hz) and took the derivative of fascicle length with  
174 respect to time to determine fascicle velocity.

175

176 To quantify soleus kinetics, we used a custom Matlab script (Mathworks Inc., Natick, MA, USA)  
177 that filtered motion capture data using a fourth-order low-pass Butterworth filter (6 Hz) and  
178 subtracted the resting dynamometer torque from the corresponding trial torque. We computed net  
179 dynamometer torque from 12 consecutive moment generation cycles that encompassed the  
180 analyzed fascicle kinematic data. Due to small fluctuations in dynamometer torque, we  
181 implemented a 1 Nm dynamometer torque threshold to decipher the duration of active force  
182 production. Using anthropometric measures and filtered data, we calculated the net ankle  
183 moment using dynamometer torque and the position of the ankle's axis of rotation relative to the  
184 dynamometer's axis of rotation, then we estimated the change in soleus muscle-tendon moment  
185 arm lengths at each ankle angle (Bobbert *et al.*, 1986). In turn, we divided net ankle moment  
186 ( $m_{ank}$ ) by the Achilles tendon moment arm length ( $r_{AT}$ ) to calculate muscle-tendon force. Next,  
187 we divided muscle-tendon force by the cosine of fascicle pennation angle ( $\theta_p$ ) to calculate active  
188 soleus fascicle force ( $F_{sol}$ ).

189 
$$F_{sol} = \frac{m_{ank}}{r_{AT}} / \cos(\theta_p) \quad \text{Eq. 1}$$

190 We assumed that passive muscle fascicle forces are negligible and we omitted the data from one  
191 five-minute metabolic trial because the participant achieved an average maximum ankle moment  
192 that was >5 Nm more than targeted. Further, we deemed optimal soleus fascicle length to be  
193 consistent across muscle activation magnitudes (de Brito Fontana & Herzog, 2016) and the same  
194 value that we measured during resting at a 90° ankle angle (Beck *et al.*, 2020). We set maximum  
195 fascicle shortening velocity to 4.4 resting lengths per second (Bohm *et al.*, 2019) based on the  
196 notion that only slow oxidative soleus fibers are active during sustained metabolic trials (Beck *et*  
197 *al.*, 2020).

198

199 *Biomechanical models.* Recently, two studies performed similar experimental protocols and  
200 well-linked the mechanics of muscle fascicles cyclically producing force to metabolic energy  
201 expenditure. One study indicated that the combination of muscle fascicle force rate ( $\dot{F}$ ), positive  
202 mechanical work ( $W_+$ ), and force-time integral ( $\int F dt$ ), scaled by corresponding cost  
203 coefficients ( $a$ ,  $b$ ,  $c$ ), well-explains muscle metabolic energy expenditure (Eq. 2) (van der Zee &  
204 Kuo, 2020). The other study suggested that active muscle volume ( $V_{act}$ ) well-explains metabolic  
205 energy expenditure ( $\dot{E}_{met}$ ) during cyclic contractions that varied in duty factor (Beck *et al.*,  
206 2020). Briefly, active muscle volume is calculated using active muscle fascicle force production  
207 ( $F_{act}$ ), optimal fascicle length ( $l_0$ ), stress ( $\sigma$ ), and the fascicle's force-length and force-velocity  
208 force potential ( $FL$  and  $FV$ , respectively) (Eq. 3) (Beck *et al.*, 2019). Due to the similarity of  
209 these previous studies to the present one, as a secondary objective of this paper we tested

210 whether those muscle mechanics models could explain the present study's metabolic data (Eq. 2  
211 and 3).

$$212 \quad \dot{E}_{met} = (a)\dot{F} + (b)W_+ + (c) \int F dt \quad \text{Eq. 2}$$

$$213 \quad \dot{E}_{met} \propto V_{act} = \frac{F_{act} \cdot l_0}{\sigma \cdot FL \cdot FV} \quad \text{Eq. 3}$$

214 *Muscle activation.* We band-pass filtered the raw soleus, lateral gastrocnemius, and tibialis  
215 anterior, electromyography signals between 20 and 450 Hz from the same 12 consecutive torque  
216 generation cycles that we used to assess net ankle moment. We full-wave rectified the filtered  
217 electromyography signals and calculated the root mean square of the rectified signals using a 40-  
218 millisecond moving window. Due to technical issues, we were unable to collect one participant's  
219 tibialis anterior activation during the metabolic trials.

220

221 *Metabolic energy expenditure.* During the resting trial and each cyclic force-production trial, we  
222 used open-circuit expired gas analysis to record the participant's rates of oxygen uptake ( $\dot{V}_{O_2}$ )  
223 and carbon dioxide production ( $\dot{V}_{CO_2}$ ). We averaged  $\dot{V}_{O_2}$  and  $\dot{V}_{CO_2}$  over the last minute of each  
224 trial and used a standard equation to calculate metabolic power (W) (Peronnet & Massicotte,  
225 1991). Next, we subtracted each participant's resting metabolic power from their experimental  
226 values to yield net metabolic power. We removed three metabolic data values (of 54) from our  
227 analyses because the corresponding respiratory exchange ratio did not reflect a respiratory  
228 quotient value that was indicative of fat and/or carbohydrate oxidation (Peronnet & Massicotte,  
229 1991).

230

231 *Statistical analyses.* Unless otherwise specified, we performed all statistical tests within the  
232 targeted lower and higher ankle moment trials independently. We performed t-tests to determine  
233 whether the targeted lower and higher cycle-average torque trials elicited different average ankle  
234 moments. We performed linear mixed models to determine the influence of ankle angle on the  
235 duration of active force production, force production cycle frequency, average ankle moment,  
236 average muscle-tendon force, average and maximum soleus fascicle pennation angle, average  
237 fascicle force, fascicle force-time integral, positive fascicle mechanical work, fascicle force rate,  
238 average and minimum fascicle operating lengths, maximal fascicle shortening velocity, average  
239 fascicle Hill-type force-length-velocity force potential, average soleus active muscle volume,  
240 soleus activation, lateral gastrocnemius activation, tibialis anterior activation, and net metabolic  
241 power. We also performed linear mixed models with two independent variables (average muscle  
242 fascicle length and positive mechanical work) and one dependent variable (net metabolic power).  
243 We performed independent linear regressions to determine the correlation between 1) average  
244 relative muscle fascicle length and 2) average soleus muscle activation on net metabolic power.  
245 We set the significance level ( $\alpha = 0.05$ ) and performed statistical analyses using RSTUDIO  
246 software (RSTUDIO, Inc., Boston, MA, USA).

247

## 248 **Results**

249 Consistent with the study design, participants produced two distinct cycle average  $\pm$  SD ankle  
250 moment levels:  $4.85 \pm 0.72$  Nm and  $6.58 \pm 0.94$  Nm ( $p < 0.001$ ) (Fig. 3). Within each moment  
251 level, the duration of active force production (both  $p \geq 0.158$ ), force production cycle frequency  
252 (both  $p \geq 0.375$ ), and cycle average ankle moment (both  $p \geq 0.678$ ) each remained constant across  
253 ankle angles. However, not all metrics remained constant across ankle angles. Increasing ankle

254 angle 30° lengthened participant Achilles tendon moment arms by 0.93 cm (Bobbert *et al.*,  
 255 1986), thereby decreasing average soleus muscle-tendon force (both  $p \leq 0.002$ ) (Fig. 3). Greater  
 256 ankle angles also increased average and maximum soleus fascicle pennation angles (both  
 257  $p \leq 0.001$ ) (Fig. 3), which helped yield statistically similar cycle average soleus fascicle force  
 258 production across ankle angles for the low ankle moment level ( $p=0.063$ ) but not the higher  
 259 ankle moment level ( $p=0.003$ ) (Fig. 3). Similarly, at the lower ankle moment level, soleus  
 260 fascicle force-time integral was independent of ankle angle ( $p=0.070$ ), but it decreased by 19%  
 261 due to increasing ankle angle from 90° to 120° within the higher moment level ( $p=0.003$ ) (Fig.  
 262 4).

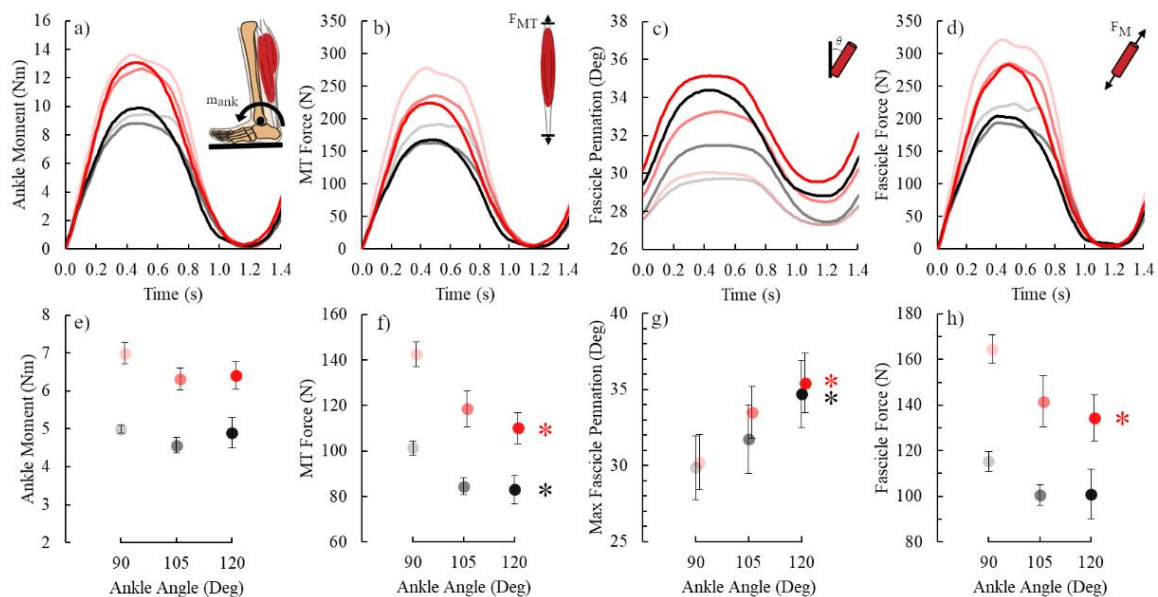

263  
 264 **Figure 3.** Top row: time-series plots of average a) ankle moment ( $m_{ank}$ ), b) muscle-tendon force  
 265 ( $F_{MT}$ ), c) soleus fascicle pennation angle, and d) soleus fascicle force ( $F_M$ ). Bottom row: average  
 266  $\pm$  SE e) average ankle moment, f) average MT force, g) maximum fascicle pennation angle, and  
 267 h) average soleus fascicle force versus ankle angle. Black and red symbols are offset for clarity  
 268 and indicate the lower and higher ankle moment levels, respectively. Lighter to darker colors  
 269 indicate more dorsiflexed to plantar flexed ankle angles per moment level. Black and red  
 270 asterisks (\*) indicate that the corresponding moment level's ankle angle affects the indicated  
 271 dependent variable ( $p < 0.05$ ).

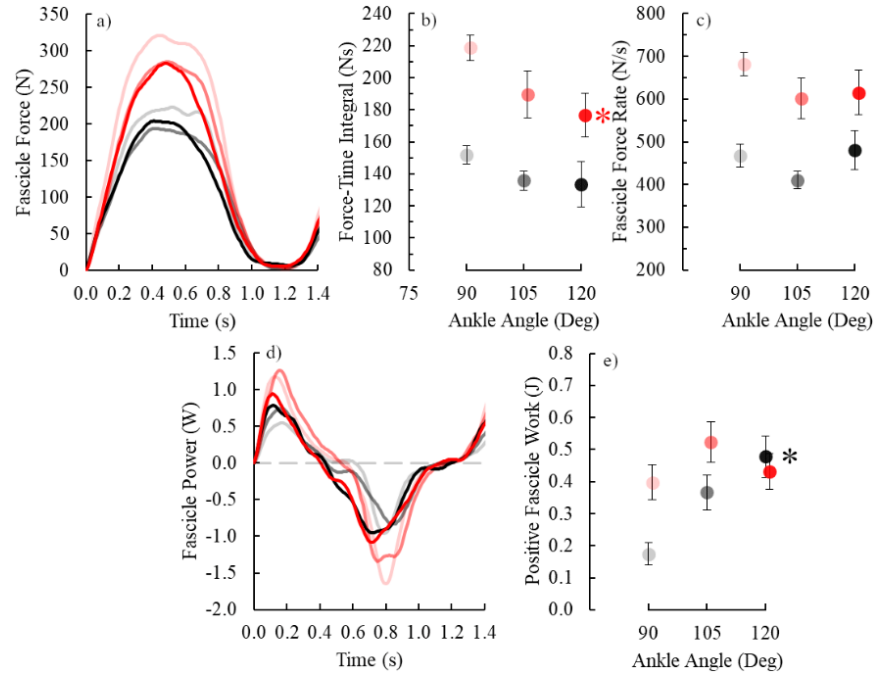

272

273 **Figure 4.** Time-series plots of average soleus fascicle a) force and d) power, as well as average  $\pm$   
 274 SE soleus fascicle b) total force-time integral, c) force rate, d) and positive mechanical work.  
 275 Black and red symbols are offset for clarity and indicate the lower and higher ankle moment  
 276 levels, respectively. Lighter to darker colors indicate more dorsiflexed to plantar flexed ankle  
 277 angles per moment level. Black and red asterisks (\*) indicate that the corresponding moment  
 278 level's ankle angle affects the indicated dependent variable ( $p < 0.05$ ).

279

280 Despite systematically shortening soleus fascicle lengths, increasing ankle angle did not alter  
 281 many biomechanical parameters that previous dynamometer studies well-linked to net metabolic  
 282 power. Specifically, both average and minimal soleus fascicle operating lengths decreased with  
 283 increasing ankle angle (both  $p < 0.001$ ). These shorter fascicle operating lengths reduced the  
 284 average soleus fascicle force-length potential by 7-8% across ankle moment levels ( $p < 0.001$ )  
 285 (Fig. 5). Further, greater ankle angles yielded faster maximum soleus fascicle shortening  
 286 velocities at the lower ankle moment level ( $p < 0.001$ ), but not the higher ankle moment level  
 287 ( $p = 0.099$ ). Combining cycle average fascicle force production and force-length-velocity  
 288 potential (Beck *et al.*, 2019), ankle angle did not affect estimated cycle average soleus active

289 muscle volume (both  $p \geq 0.122$ ) (Fig. 5). Additionally, as aforementioned soleus fascicle force-  
 290 time integral remained constant or slightly decreased with increased ankle angles (Fig. 3).  
 291 Regarding the other metrics from equations 2 and 3 (Beck *et al.*, 2019; van der Zee & Kuo,  
 292 2020), soleus fascicle force-rate was independent of ankle angle (both  $p \geq 0.235$ ) (Fig. 4), and  
 293 positive soleus fascicle work increased across ankle angles within the lower ankle moment level  
 294 ( $p < 0.001$ ), but not within the higher ankle moment level ( $p = 0.591$ ) (Fig. 4)..

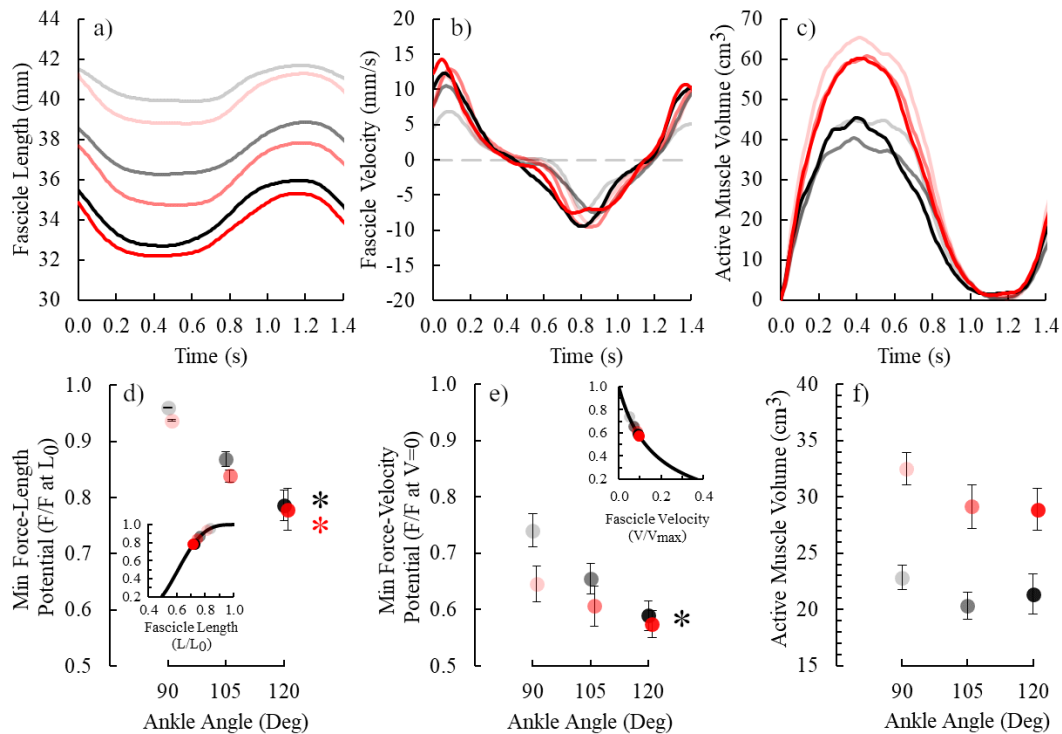

295  
 296 **Figure 5.** Top row: time-series plots of average soleus a) fascicle length, b) fascicle velocity, and  
 297 c) active muscle volume. Bottom row: average  $\pm$  SE d) minimum Hill-type force-length  
 298 potential, e) minimum Hill-type force-velocity potential, and average f) active muscle volume  
 299 versus ankle angle. Within panels d) and e) are the respective force-potentials plotted on the  
 300 force-length and force-velocity curves, respectively. Black and red symbols are offset for clarity  
 301 and indicate the lower and higher ankle moment levels, respectively. Lighter to darker colors  
 302 indicate more dorsiflexed to plantar flexed ankle angles per moment level. Black and red  
 303 asterisks (\*) indicate that the corresponding moment level's ankle angle affects the indicated  
 304 dependent variable ( $p < 0.05$ ).

305

306 Cyclically producing force at different ankle angles altered plantar flexor muscle activation. Both  
307 soleus and lateral gastrocnemius muscle activation increased by 140-200% with increasing ankle  
308 angle within each moment level (all  $p < 0.001$ ) (Fig. 6). Even though tibialis anterior activation  
309 statistically increased at greater ankle angles (both  $p \leq 0.027$ ), we considered its influence on net  
310 metabolic power to be trivial because its cycle average activation was merely 2-5% of its MVC  
311 value across conditions.

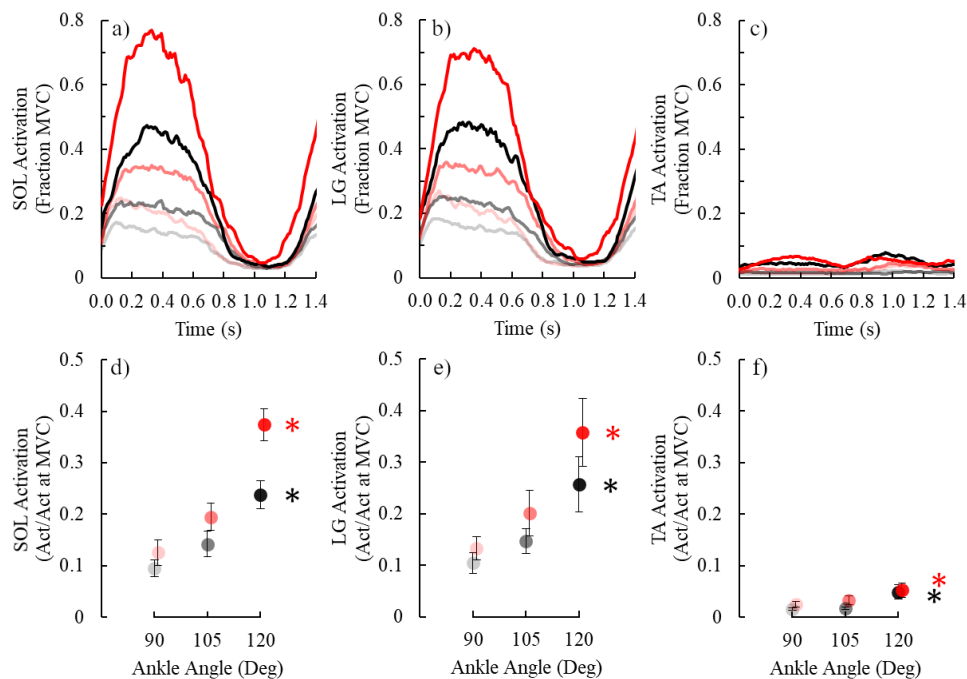

312

313 **Figure 6.** Top row: time-series plots of average a) soleus (SOL) activation (Act), b) lateral  
314 gastrocnemius (LG) activation, and c) tibialis anterior (TA) activation. Bottom row: average  $\pm$   
315 SE d) SOL activation, e) LG activation, and f) TA activation versus ankle angle. MVC is  
316 maximum voluntary contraction. Black and red symbols are offset for clarity and indicate the  
317 lower and higher ankle moment levels, respectively. Lighter to darker colors indicate more  
318 dorsiflexed to plantar flexed ankle angles per moment level. Black and red asterisks (\*) indicate  
319 that the corresponding moment level's ankle angle affects the indicated dependent variable  
320 ( $p < 0.05$ ).

321

322 Ankle angle affected the metabolic power of cyclic force production. Changing ankle angle from  
323 90° to 120° increased net metabolic power by 189% and 228% within the lower and higher ankle



324 moment levels, respectively (both  $p < 0.001$ ) (Fig. 7). Unlike previous dynamometer studies  
325 (Beck *et al.*, 2020; van der Zee & Kuo, 2020), neither the combined cost of muscle force-time  
326 integral, positive mechanical work, and force rate (Eq. 2); nor active muscle volume (Eq. 3)  
327 could explain the metabolic data (Suppl. Fig. 1). This is especially evident within the higher  
328 moment level where net metabolic power increased by 228% across ankle angles, but all of the  
329 following variables were either unchanged or decreased with increasing ankle angle (Suppl. Fig.  
330 1): force-time integral (Fig. 4), force rate (Fig. 4), positive mechanical work (Fig. 4), and active  
331 muscle volume (Fig. 5). Further, within each moment level, positive mechanical work did not  
332 relate to net metabolic power while controlling for the influence of average fascicle length  
333 ( $p \geq 0.405$ ). On the contrary, while controlling for positive mechanical work, decreasing average  
334 fascicle length was associated with an increased net metabolic power (both  $\beta = -1.4$  to  $-3.1$ ;  
335  $p \leq 0.047$ ). Pooled across ankle moment levels and participants, without controlling for other  
336 mechanical parameters, average relative muscle fascicle operating length inversely correlated  
337 with net metabolic power (linear regression:  $r = -0.179$ ,  $p = 0.002$ ). Additionally, average soleus  
338 activation positively correlated with net metabolic power across ankle moment levels and  
339 participants ( $r = 0.51$ ,  $p < 0.001$ ) (Fig. 7).

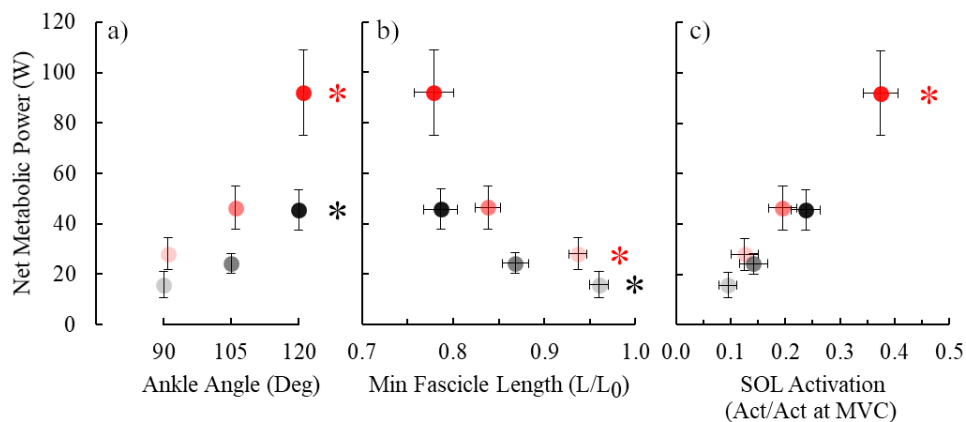

340

341 **Figure 7.** Average  $\pm$  SE net metabolic power versus a) ankle angle, b) minimum fascicle length,  
342 and c) average soleus activation. Black and red symbols are offset for clarity and indicate the  
343 lower and higher ankle moment levels, respectively. Lighter to darker colors indicate more  
344 dorsiflexed to plantar flexed ankle angles per moment level. Black and red asterisks (\*) indicate  
345 that the corresponding moment level's ankle angle affects the indicated dependent variable ( $p <$   
346  $0.05$ ).

347

## 348 **Discussion**

349 During locomotion, relative muscle fascicle operating lengths depend on the body's posture,  
350 kinetics, and structural properties. In the present study, we controlled for participant limb-joint  
351 kinetics (constant cycle average ankle moment), structural properties (within participant design),  
352 and independently altered muscle fascicle operating lengths via postural changes (changing ankle  
353 angle). Using this protocol, we found that reduced muscle fascicle operating lengths *per se*  
354 increased metabolic energy expenditure during cyclic force production – supporting our  
355 hypothesis.

356

357 Why does cyclically producing force at relatively shorter muscle fascicle lengths increase  
358 metabolic energy expenditure? Muscle metabolic energy expenditure increases by either  
359 activating a greater volume of muscle or by expending more metabolic energy per unit active  
360 muscle volume (increased metabolic power density,  $W/cm^3$ ) (Beck *et al.*, 2019). Our results  
361 suggest that relative fascicle lengths primarily affect the latter. To explain, within the higher  
362 ankle moment level, changing ankle angle from  $90^\circ$  to  $120^\circ$  shortened average muscle fascicle  
363 operating lengths by 17% and decreased fascicle force-potential by 8% (Hill, 1953; Gordon *et*  
364 *al.*, 1966). To keep producing the same force profile, active muscle volume could theoretically  
365 increase by 8% (Hill, 1953; Gordon *et al.*, 1966). We would predict this change to elicit a mere

366 8% greater net metabolic power (Beck *et al.*, 2019), which is a far cry from the observed 228%  
367 increased metabolic energy expenditure. Therefore, even if there is a small increase in active  
368 muscle volume due to operating at shorter muscle fascicle lengths (*i.e.*, 8%), which we did not  
369 detect in our data, metabolic power density would need to increase by ~200% across ankle  
370 angles to match the net metabolic power data. In other words, producing force at relatively  
371 shorter fascicle lengths is likely metabolically expensive because muscles utilize ATP at faster  
372 rates, not because of the recruitment of more muscle fibers.

373

374 An increased metabolic power density from producing force at relatively shorter muscle lengths  
375 may be attributed to at least two factors. First, when sarcomeres produce force at shorter lengths  
376 than optimal, force production decreases faster than the corresponding ATP utilization (Fig. 1)  
377 (Elzinga *et al.*, 1984; Stephenson *et al.*, 1989; Kentish & Stienen, 1994; Hilber *et al.*, 2001). One  
378 proposed mechanism is that the net force produced by relatively shorter sarcomeres is mitigated  
379 by opposing forces that arise from compressed myofibrillar proteins. Another contributing factor  
380 that could help explain both greater muscle activation and net metabolic power at relatively  
381 shorter fascicle lengths is increased rate-coding (Enoka, 2015; Christie *et al.*, 2016). To continue  
382 producing a similar force magnitude at shorter fascicle lengths, participants may have increased  
383 the discharge rate of their soleus motor units, which would cycle ATP utilizing actin-myosin  
384 cross-bridges faster - thereby increasing metabolic power density.

385

386 It is important to recognize the difference between absolute and relative muscle fascicle  
387 operating length since they affect metabolic energy expenditure in different directions. Across

388 vertebrates, the dimensions and quantity of actin-myosin cross-bridges per sarcomere are  
389 generally constant (Taylor, 1994; Burkholder & Lieber, 2001). This means that animals with  
390 optimally longer muscle fascicles typically have more sarcomeres in-series than animals with  
391 optimally shorter fascicles. Because whole-muscle force production depends on a muscle's  
392 cross-sectional area and not its length, while considering other factors, absolutely longer muscle  
393 fascicles yield less economical force production due to more ATP consuming cross-bridges per  
394 unit force production (Taylor, 1994; Roberts *et al.*, 1998). However, shortening a muscle fascicle  
395 by a fixed distance (*e.g.*, 10 mm), shifts sarcomeres further down their ascending limb in an  
396 optimally shorter versus longer fascicle (*e.g.*, 40 mm versus 50 mm). Based on our data,  
397 decreasing a muscle fascicle's length by a fixed distance likely increases metabolic energy  
398 expenditure more in an optimally shorter versus longer muscle fascicle. Hence, accounting for  
399 both absolute and relative muscle fascicle lengths may help explain the metabolic differences  
400 across participants with different optimal muscle fascicle lengths – such as in individuals pre-  
401 and post-injury (Williams & Goldspink, 1978; Hullfish *et al.*, 2019).

402

403 Accounting for both absolute and relative muscle fascicle lengths during locomotion may also  
404 help explain the differences in metabolic energy expenditure across animal species. For example,  
405 per unit body mass, smaller animals (*e.g.*, mice) have shorter muscle fascicles (Alexander *et al.*,  
406 1981; Bennett, 1996) and expend more metabolic energy during locomotion than larger animals  
407 (*e.g.*, elephants) (Taylor *et al.*, 1970; Taylor *et al.*, 1982; Pontzer, 2007; Rubenson *et al.*, 2007).  
408 Based on the metabolic energy expenditure of producing force isometrically at an optimal  
409 fascicle length, the characteristically shorter muscle fascicles in smaller animals is  
410 conventionally viewed as an economical trait (Kram & Taylor, 1990; Roberts *et al.*, 1998; Kram,

411 2000). However, since many muscles in walking and running animals produce force while on the  
412 ascending limb of their force-length curve (Roberts *et al.*, 1997; Biewener & Corning, 2001;  
413 Burkholder & Lieber, 2001; Daley & Biewener, 2003; Rubenson *et al.*, 2012; Bohm *et al.*,  
414 2019), optimally shorter muscle fascicle lengths may not necessarily translate to more  
415 economical locomotion. This may be especially true regarding comparisons across animals sizes,  
416 considering that smaller animals have relatively greater extensor muscle forces (Biewener, 1989)  
417 and more compliant tendons (Biewener, 2000) than larger animals; since both factors contribute  
418 to shorter muscle fascicles operating lengths. Hence, future studies that consider relative, in  
419 addition to absolute, muscle fascicle length during locomotion may better link walking and  
420 running biomechanics to metabolic energy expenditure across species.

421

422 There are many assumptions that may limit the findings of this study. First, consistent with  
423 previous studies (Beck *et al.*, 2020; van der Zee & Kuo, 2020), we assumed that the metabolic  
424 contribution of co-activating leg muscles was negligible. This assumption is based on the notion  
425 that there was likely slack in the biarticular gastrocnemius muscle-tendons (Rubenson *et al.*,  
426 2012) and that the tibialis anterior muscle activation was trivial (Fig. 6). Second, we assumed  
427 that the soleus is primarily comprised of homogeneous muscle fibers (Johnson *et al.*, 1973), and  
428 that these fibers are exclusively recruited during the present study's submaximal metabolic trials  
429 (Henneman, 1957). Hence, we deemed all active muscle fascicles in the soleus to have the same  
430 maximum shortening velocity, which we estimated to be 4.4 optimal lengths per second (Bohm  
431 *et al.*, 2019). As mentioned, we assumed that the soleus had uniform fascicle mechanics across  
432 the whole muscle, which is oversimplifies the complex architecture of the human soleus  
433 (Bolsterlee *et al.*, 2018). Nonetheless, passively changing muscle-tendon length alters soleus

434 fascicle lengths and pennation angles change in the same direction across soleus muscle  
435 compartments (Bolsterlee *et al.*, 2018). Despite our many limitations and non-locomotor  
436 experiment, we find assurance when comparing our results to the most analogous locomotion  
437 experiment - walking in footwear with different heel heights. Similar to our study, increasing  
438 footwear heel height elicits postural changes that reduce triceps surae muscle fascicle forces  
439 (Simonsen *et al.*, 2012), relative muscle fascicle operating lengths (Csapo *et al.*, 2010; Cronin *et*  
440 *al.*, 2012), and increase whole-body metabolic energy expenditure during walking and running  
441 compared baseline conditions (*i.e.*, barefoot or in flats) (Ebbeling *et al.*, 1994; Gu & Li, 2013).

442

443 In conclusion, our results suggest that operating further down the ascending limb of a muscle's  
444 force-length curve may have a measurable influence on the metabolic energy expenditure during  
445 locomotion. Implications may help resolve why locomotion economy differs across and within  
446 animal species, in addition to informing biomechanical interventions that reduce user metabolic  
447 energy expenditure and consequently augment locomotor performance.

448

449 *Authors' contributions.* O.N.B. contributed to the conception and design of the study, acquisition  
450 of data, the analysis and interpretation of data, as well as the drafting of the article. J.N.S. &  
451 L.H.T. contributed to acquisition of data and the revising of the article. J.R.F. contributed to the  
452 conception of the study, interpretation of data, as well as the drafting of the article. G.S.S.  
453 contributed to the conception and design of the study, the analysis and interpretation of data, as  
454 well as the drafting of the article. All authors approve of the manuscript and agree to be held

455 accountable for all aspects of the work in ensuring that questions related to the accuracy or  
456 integrity of any part of the work are appropriately investigated and resolved.

457 *Competing interests:* We have no competing interests.

458 *Data accessibility:* Our data will be available on the corresponding and senior author's personal  
459 websites upon acceptance ([sites.google.com/view/owenbeck](https://sites.google.com/view/owenbeck) &  
460 [sites.gatech.edu/hpl/publications/](https://sites.gatech.edu/hpl/publications/))

461 *Funding:* This study was supported by a National Institute of Health's Institute of Aging  
462 Fellowship (F32AG063460) awarded to O.N.B. and a National Institute of Health's Institute of  
463 Aging grant no. (R0106052017) awarded to J.R.F. and G.S.S.

## References

- 464  
465  
466 Alexander RM, Jayes A, Maloiy G & Wathuta E. (1981). Allometry of the leg muscles of  
467 mammals. *J Zool* **194**, 539-552.
- 468  
469 Beck ON, Gosyne J, Franz JR & Sawicki GS. (2020). Cyclically producing the same average  
470 muscle-tendon force with a smaller duty increases metabolic rate. *Proc Royal Soc B* **287**,  
471 20200431.
- 472  
473 Beck ON, Kipp S, Byrnes WC & Kram R. (2018). Use aerobic energy expenditure instead of  
474 oxygen uptake to quantify exercise intensity and predict endurance performance. *J Appl*  
475 *Physiol* **125**, 672-674.
- 476  
477 Beck ON, Punith LK, Nuckols RW, Sawicki GS. (2019). Exoskeletons improve locomotion  
478 economy by reducing active muscle volume. *Exerc Sport Sci Rev* **47**, 237-245.
- 479  
480 Bennett M. (1996). Allometry of the leg muscles of birds. *J Zool* **238**, 435-443.
- 481  
482 Biewener AA. (1989). Scaling body support in mammals: limb posture and muscle mechanics.  
483 *Science* **245**, 45-48.
- 484  
485 Biewener AA. (2000). *Scaling of terrestrial support: differing solutions to mechanical*  
486 *constraints of size*. *Scaling in Biology*.
- 487  
488 Biewener AA & Corning WR. (2001). Dynamics of mallard (*Anas platyrhynchos*) gastrocnemius  
489 function during swimming versus terrestrial locomotion. *J Exp Biol* **204**, 1745-1756.
- 490  
491 Bobbert MF, Huijing PA & van Ingen Schenau GJ. (1986). A model of the human triceps surae  
492 muscle-tendon complex applied to jumping. *J Biomech* **19**, 887-898.
- 493  
494 Bohm S, Mersmann F, Santuz A & Arampatzis A. (2019). The force-length-velocity potential of  
495 the human soleus muscle is related to the energetic cost of running. *Proc Royal Soc B*  
496 **286**, 20192560.
- 497  
498 Bolsterlee B, Finni T, D'Souza A, Eguchi J, Clarke EC & Herbert RD. (2018). Three-  
499 dimensional architecture of the whole human soleus muscle in vivo. *PeerJ* **6**, e4610-  
500 e4610.
- 501  
502 Burkholder TJ & Lieber RL. (2001). Sarcomere length operating range of vertebrate muscles  
503 during movement. *J Exp Biol* **204**, 1529-1536.



- 504  
505 Christie AD, Foulis SA & Kent JA. (2016). ATP cost of muscle contraction is associated with  
506 motor unit discharge rate in humans. *Neurosci Lett* **629**, 186-188.
- 507  
508 Cronin NJ, Barrett RS & Carty CP. (2012). Long-term use of high-heeled shoes alters the  
509 neuromechanics of human walking. *J Appl Physiol* **112**, 1054-1058.
- 510  
511 Csapo R, Maganaris C, Seynnes O & Narici M. (2010). On muscle, tendon and high heels. *J Exp*  
512 *Biol* **213**, 2582-2588.
- 513  
514 Daley MA & Biewener AA. (2003). Muscle force-length dynamics during level versus incline  
515 locomotion: a comparison of in vivo performance of two guinea fowl ankle extensors. *J*  
516 *Exp Biol* **206**, 2941-2958.
- 517  
518 de Brito Fontana H & Herzog W. (2016). Vastus lateralis maximum force-generating potential  
519 occurs at optimal fascicle length regardless of activation level. *Euro J Appl Physiol* **116**,  
520 1267-1277.
- 521  
522 Ebbeling CJ, Hamill J & Crusemeyer JA. (1994). Lower extremity mechanics and energy cost  
523 of walking in high-heeled shoes. *J Orthop Sports Phys Ther* **19**, 190-196.
- 524  
525 Elzinga G, Peckham M & Woledge R. (1984). The sarcomere length dependence of the rate of  
526 heat production during isometric tetanic contraction of frog muscles. *J Physiol* **357**, 495-  
527 504.
- 528  
529 Enoka RM. (2015). *Neuromechanics of human movement 5th edition*. Human Kinetics.
- 530  
531 Farris DJ & Lichtwark GA. (2016). UltraTrack: Software for semi-automated tracking of muscle  
532 fascicles in sequences of B-mode ultrasound images. *Comput Meth Prog Bio* **128**, 111-  
533 118.
- 534  
535 Fenn WO. (1924). The relation between the work performed and the energy liberated in  
536 muscular contraction. *J Physiol* **58**, 373.
- 537  
538 Gordon A, Huxley AF & Julian F. (1966). The variation in isometric tension with sarcomere  
539 length in vertebrate muscle fibres. *J Physiol* **184**, 170-192.
- 540  
541 Griffin TM, Roberts TJ & Kram R. (2003). Metabolic cost of generating muscular force in  
542 human walking: insights from load-carrying and speed experiments. *J Appl Physiol* **95**,  
543 172-183.

- 544  
545 Gu Y & Li Z. (2013). Effect of shoes' heel height on the energy cost during jogging. *Res J Appl*  
546 *Sci* **6**, 1531-1533.
- 547  
548 Henneman E. (1957). Relation between size of neurons and their susceptibility to discharge.  
549 *Science* **126**, 1345-1347.
- 550  
551 Hessel AL, Raiteri BJ, Marsh MJ & Hahn D. (2020). Rightward shift of optimal fascicle length  
552 with decreasing voluntary activity level in the soleus and lateral gastrocnemius muscles. *J*  
553 *Exp Biol* jeb.235614.
- 554  
555 Hilber K, Sun YB & Irving M. (2001). Effects of sarcomere length and temperature on the rate  
556 of ATP utilisation by rabbit psoas muscle fibres. *J Physiol* **531**, 771-780.
- 557  
558 Hill AV. (1953). The mechanics of active muscle. *Proc Royal Soc B* **141**, 104-117.
- 559  
560 Holt NC & Azizi E. (2014). What drives activation-dependent shifts in the force-length curve?  
561 *Biol Lett* **10**, 20140651.
- 562  
563 Hoogkamer W, Kipp S, Spiering BA & Kram RJ. (2016). Altered running economy directly  
564 translates to altered distance-running performance. *Med Sci Sports Exerc* **48**, 2175-2180.
- 565  
566 Hullfish TJ, O'Connor KM & Baxter JR. (2019). Gastrocnemius fascicles are shorter and more  
567 pennate throughout the first month following acute Achilles tendon rupture. *PeerJ* **7**,  
568 e6788.
- 569  
570 Johnson MA, Polgar J, Weightman D & Appleton D. (1973). Data on the distribution of fibre  
571 types in thirty-six human muscles: an autopsy study. *J Neurol Sci* **18**, 111-129.
- 572  
573 Kawakami Y, Amemiya K, Kanehisa H, Ikegawa S & Fukunaga T. (2000). Fatigue responses of  
574 human triceps surae muscles during repetitive maximal isometric contractions. *J Appl*  
575 *Physiol* **88**, 1969-1975.
- 576  
577 Kentish JC & Stienen G. (1994). Differential effects of length on maximum force production and  
578 myofibrillar ATPase activity in rat skinned cardiac muscle. *J Physiol* **475**, 175-184.
- 579  
580 Kipp S, Grabowski AM & Kram R. (2018). What determines the metabolic cost of human  
581 running across a wide range of velocities? *J Exp Biol* **221**, jeb184218.
- 582

- 583 Kram R. (2000). Muscular force or work: what determines the metabolic energy cost of running.  
584 *Exerc Sport Sci Rev* **28**, 138-143.
- 585
- 586 Kram R & Taylor CR. (1990). Energetics of running: a new perspective. *Nature* **346**, 265-267.
- 587
- 588 Marsh RL & Ellerby DJ. (2006). Partitioning locomotor energy use among and within muscles  
589 Muscle blood flow as a measure of muscle oxygen consumption. *J Exp Biol* **209**, 2385-  
590 2394.
- 591
- 592 Minetti AE & Alexander RM. (1997). A theory of metabolic costs for bipedal gaits. *J Theor Biol*  
593 **186**, 467-476.
- 594
- 595 Nuckols RW, Dick TJM, Beck ON & Sawicki GS. (2020). Ultrasound imaging links soleus  
596 muscle neuromechanics and energetics during human walking with elastic ankle  
597 exoskeletons. *Sci Rep* **10**, 3604.
- 598
- 599 Ortega JO, Lindstedt SL, Nelson FE, Jubrias SA, Kushmerick MJ & Conley KE. (2015). Muscle  
600 force, work and cost: a novel technique to revisit the Fenn effect. *J Exp Biol* **218**, 2075-  
601 2082.
- 602
- 603 Peronnet F & Massicotte D. (1991). Table of nonprotein respiratory quotient: an update. *J Canad*  
604 *Sci Sport* **16**, 23-29.
- 605
- 606 Pontzer H. (2007). Effective limb length and the scaling of locomotor cost in terrestrial animals.  
607 *J Exp Biol* **210**, 1752-1761.
- 608
- 609 Pontzer H. (2016). A unified theory for the energy cost of legged locomotion. *Biol Lett* **12**,  
610 20150935.
- 611
- 612 Poole DC, Gaesser GA, Hogan MC, Knight DR & Wagner PD. (1992). Pulmonary and leg VO<sub>2</sub>  
613 during submaximal exercise: implications for muscular efficiency. *J Appl Physiol* **72**,  
614 805-810.
- 615
- 616 Roberts TJ, Chen MS & Taylor CR. (1998). Energetics of bipedal running. II. Limb design and  
617 running mechanics. *J Exp Biol* **201**, 2753-2762.
- 618
- 619 Roberts TJ, Marsh RL, Weyand PG & Taylor CR. (1997). Muscular force in running turkeys: the  
620 economy of minimizing work. *Science* **275**, 1113.
- 621

- 622 Rubenson J, Heliamas DB, Maloney SK, Withers PC, Lloyd DG & Fournier PA. (2007).  
623 Reappraisal of the comparative cost of human locomotion using gait-specific allometric  
624 analyses. *J Exp Biol* **210**, 3513-3524.
- 625  
626 Rubenson J, Pires NJ, Loi HO, Pinniger GJ & Shannon DG. (2012). On the ascent: the soleus  
627 operating length is conserved to the ascending limb of the force-length curve across gait  
628 mechanics in humans. *J Exp Biol* **215**, 3539-3551.
- 629  
630 Simonsen EB, Svendsen MB, Nørreslet A, Baldvinsson HK, Heilskov-Hansen T, Larsen PK,  
631 Alkjær T & Henriksen M. (2012). Walking on high heels changes muscle activity and the  
632 dynamics of human walking significantly. *J Appl Biomech* **28**, 20-28.
- 633  
634 Stephenson D, Stewart A & Wilson G. (1989). Dissociation of force from myofibrillar  
635 MgATPase and stiffness at short sarcomere lengths in rat and toad skeletal muscle. *J*  
636 *Physiol* **410**, 351-366.
- 637  
638 Taylor C, Schmidt-Nielsen K & Raab J. (1970). Scaling of energetic cost of running to body size  
639 in mammals. *Am J Physiol* **219**, 1104-1107.
- 640  
641 Taylor CR. (1994). Relating mechanics and energetics during exercise. *Adv Vet Sci Comp Med*  
642 **38**, 181.
- 643  
644 Taylor CR, Heglund NC & Maloiy GM. (1982). Energetics and mechanics of terrestrial  
645 locomotion. I. Metabolic energy consumption as a function of speed and body size in  
646 birds and mammals. *J Exp Biol* **97**, 1-21.
- 647  
648 van der Zee TJ & Kuo AD. (2020). The high energetic cost of rapid force development in cyclic  
649 muscle contraction. *bioRxiv*. doi.org/10.1101/2020.08.25.266965
- 650  
651 Williams PE & Goldspink G. (1978). Changes in sarcomere length and physiological properties  
652 in immobilized muscle. *J Anat* **127**, 459-468.
- 653  
654

655

## Supplementary Figures

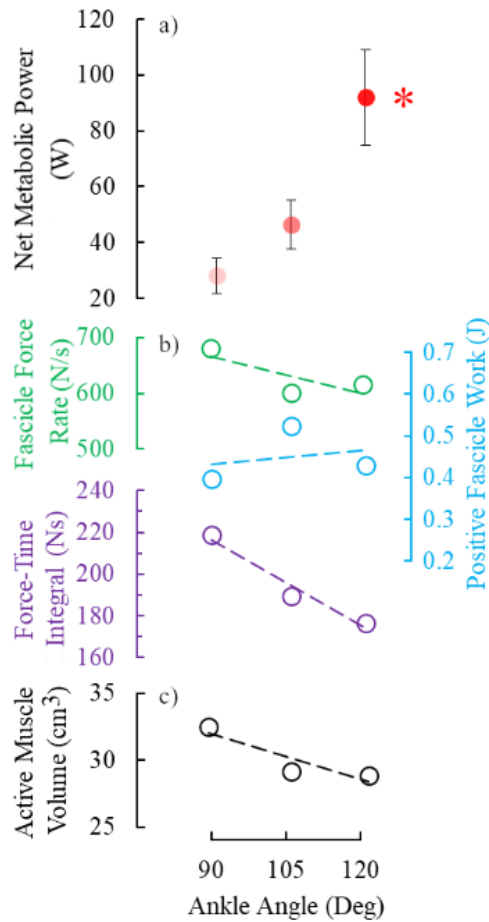

656

657 **Supplementary Figure 1.** Net metabolic power is independent from the cost of 1) the sum of  
658 soleus fascicle force rate, positive fascicle work, and force-time integral, and 2) active muscle  
659 volume at the high ankle moment level (cycle average ankle moment: 6.57 Nm). a) Average  $\pm$   
660 SE net metabolic power versus ankle angle. b) Average soleus fascicle force rate, positive  
661 fascicle work, force-time integral, and c) active muscle volume versus ankle angle. Dashed lines  
662 indicate linear regression. For panels b and c, symbol color corresponds to the respective colored  
663 y-axis.
